# Supplementary figures and images for: Rationale and methods of the IDOMENEO health outcomes of the peripheral arterial disease revascularisation study in the GermanVasc registry
Source: Atypon-hosted journal article supplement (doi:10.1024/0301-1526/a000730), 2018-08-16

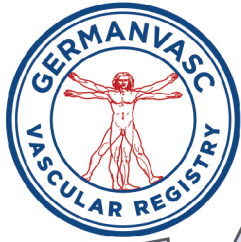

Hamburg

Berlin

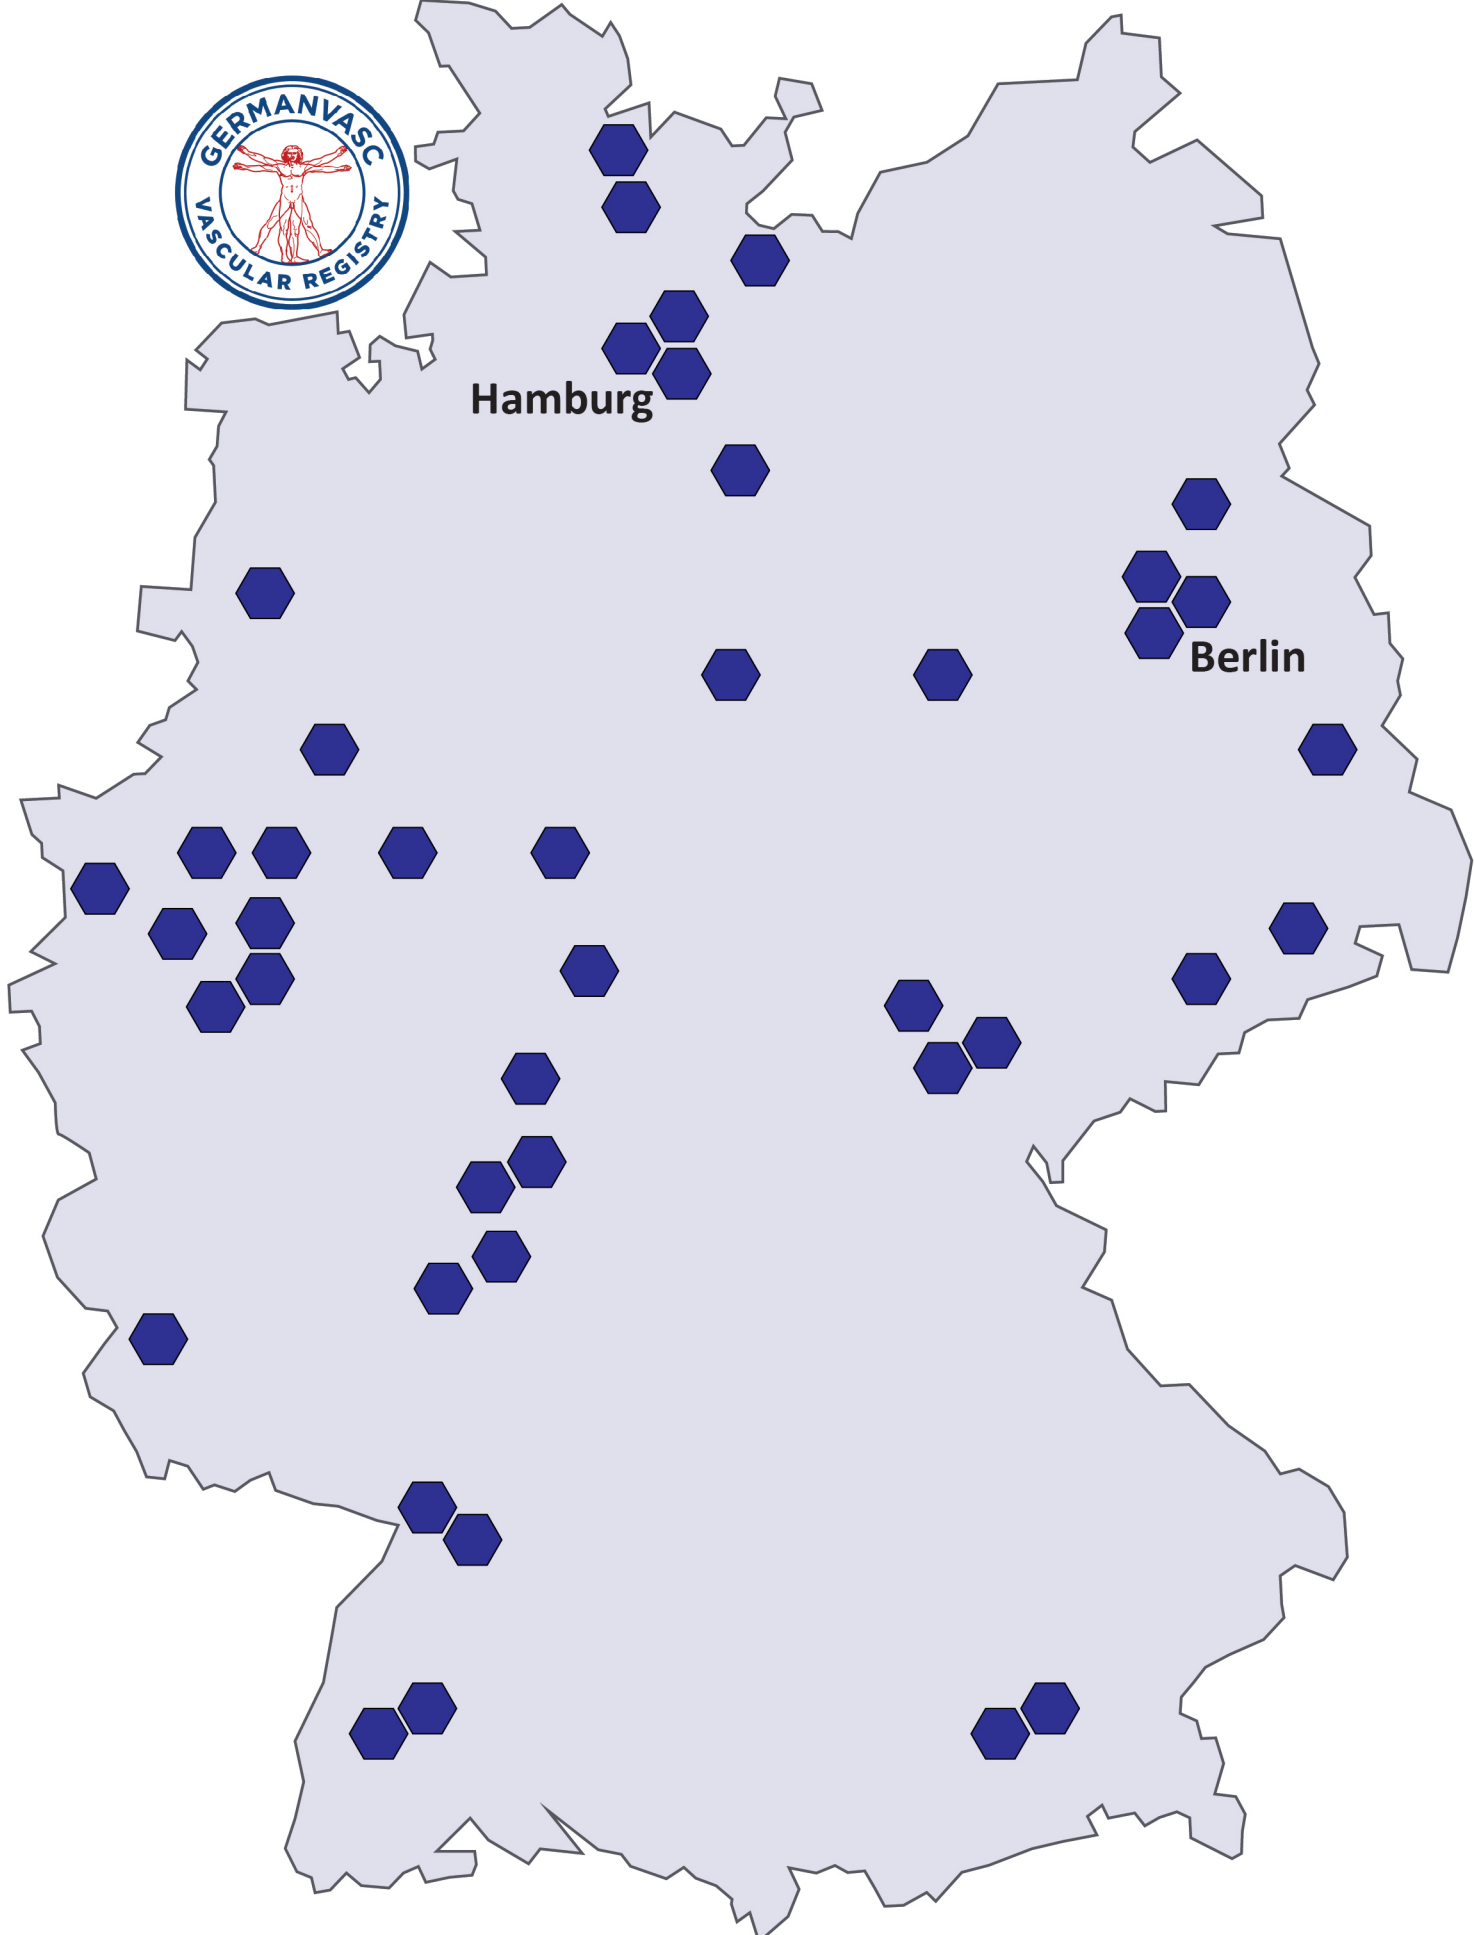

Supplement: 0301-1526_a000730_esm1.pdf [file 0301-1526_a000730_esm1.pdf]
